# Supplementary material for: Photochemical modeling of molecular and atomic oxygen based on multiple in-situ emissions measured during the Energy Transfer in the Oxygen Nightglow rocket campaign
Source: Copernicus journal article supplement (doi:10.5194/acp-2019-221), 2019-04-26

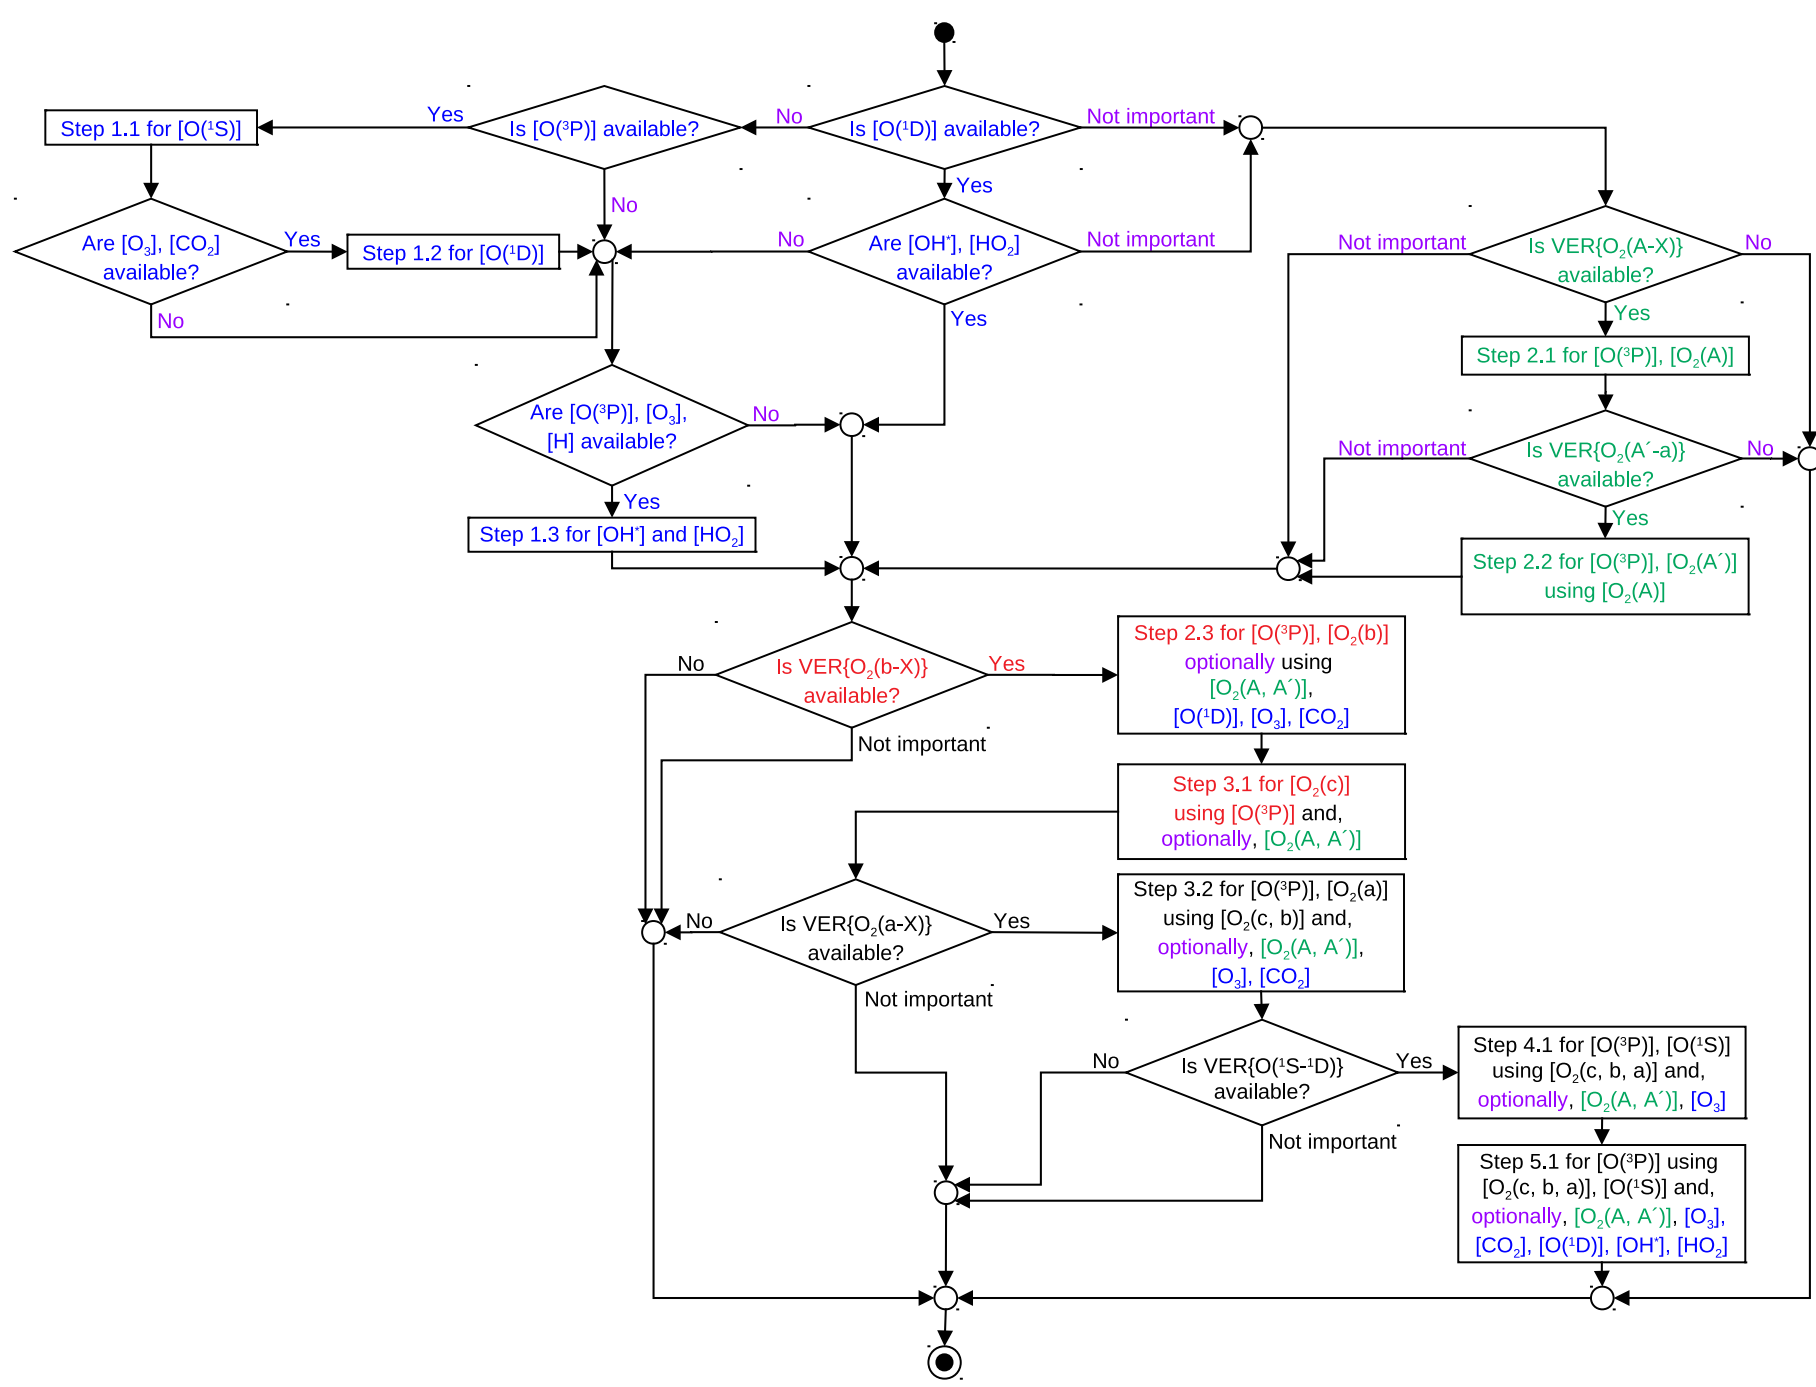

Supplement: Supplementary file [file acp-2019-221-AC2-supplement.pdf]
